# Supplementary material
Source: PubMed Central journal article supplement (PMC5655843)

## Supplementary Data

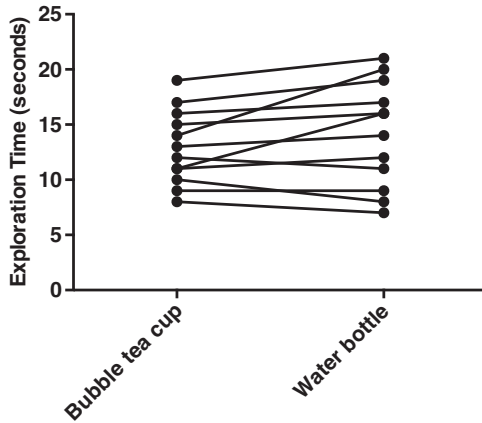

**SUPPLEMENTARY FIG. S1.** Untreated mice did not show a bias between the two NOR objects. No significant difference in exploration time (in seconds) between the objects used for the NOR testing (plastic water bottle; bubble tea cup;  $p=0.50$ ). Adolescent male CD1 mice naive to the objects were tested. NOR, novel object recognition.

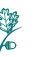

Supplement: Supp_Figure1.pdf [file Supp_Figure1.pdf]
